# Supplementary material for: Structure and stability of the (001) α-quartz surface
Source: Royal Society of Chemistry journal article supplement (doi:10.1039/b701176h), 2007-01-01
Supplement: b701176h.pdf [file b701176h.pdf]

## Supporting Information for Structure and stability of the (001) $\alpha$ -quartz surface

T. P. M. Goumans, Adrian Wander, Wendy A. Brown and C. Richard A. Catlow

### PW91 Surface energies (J/m<sup>2</sup>)

| Surface       | Depth     | PW91 |
|---------------|-----------|------|
| cleaved       | 18 layers | 2.20 |
| reconstructed | 27 layers | 0.37 |
| hydroxylated  | 18 layers | 0.19 |

### Structures

L=Large basis set, see computational details in text.

Where only surface vectors are provided (B3LYP surfaces), z-coordinates are absolute.

Bulk B3LYP/6-31G\*

cell vectors

|             |             |            |
|-------------|-------------|------------|
| 4.33313034  | -2.50173397 | 0.00000000 |
| -0.00000000 | 5.00346794  | 0.00000000 |
| 0.00000000  | 0.00000000  | 5.50385541 |

fractional coordinates

|    |             |             |             |
|----|-------------|-------------|-------------|
| Si | 0.47109730  | -0.00000000 | 0.33333333  |
| Si | 0.00000000  | 0.47109730  | -0.33333333 |
| Si | -0.47109730 | -0.47109730 | 0.00000000  |
| O  | 0.41465454  | 0.26644586  | 0.21336923  |
| O  | -0.26644586 | 0.14820868  | -0.45329744 |
| O  | -0.14820868 | -0.41465454 | -0.11996410 |
| O  | 0.14820868  | -0.26644586 | 0.45329744  |
| O  | -0.41465454 | -0.14820868 | 0.11996410  |
| O  | 0.26644586  | 0.41465454  | -0.21336923 |

Bulk B3LYP/L

cell vectors

|            |             |            |
|------------|-------------|------------|
| 4.33909802 | -2.50517941 | 0.00000000 |
| 0.00000000 | 5.01035882  | 0.00000000 |
| 0.00000000 | 0.00000000  | 5.49755440 |

fractional coordinates

|    |             |             |             |
|----|-------------|-------------|-------------|
| Si | 0.47187287  | 0.00000000  | 0.33333333  |
| Si | -0.00000000 | 0.47187287  | -0.33333333 |
| Si | -0.47187287 | -0.47187287 | 0.00000000  |
| O  | 0.41477567  | 0.26455347  | 0.21188160  |
| O  | -0.26455347 | 0.15022220  | -0.45478506 |
| O  | -0.15022220 | -0.41477567 | -0.12145173 |
| O  | 0.15022220  | -0.26455347 | 0.45478506  |
| O  | -0.41477567 | -0.15022220 | 0.12145173  |
| O  | 0.26455347  | 0.41477567  | -0.21188160 |

Bulk PBE

cell vectors

|             |            |            |
|-------------|------------|------------|
| 5.05224940  | 0.00000000 | 0.00000000 |
| -2.52612470 | 4.37537630 | 0.00000000 |
| 0.00000000  | 0.00000000 | 5.54678160 |

fractional coordinates

|    |            |            |            |
|----|------------|------------|------------|
| O  | 0.41529600 | 0.25166200 | 0.29820500 |
| O  | 0.74833800 | 0.16363500 | 0.96487200 |
| O  | 0.83636500 | 0.58470400 | 0.63153800 |
| O  | 0.16363500 | 0.74833800 | 0.03512800 |
| O  | 0.58470400 | 0.83636500 | 0.36846100 |
| O  | 0.25166200 | 0.41529600 | 0.70179500 |
| Si | 0.47865900 | 0.00000000 | 0.16666700 |
| Si | 0.00000000 | 0.47865900 | 0.83333300 |
| Si | 0.52134100 | 0.52134100 | 0.50000000 |

Bulk PW91

cell vectors

|             |            |            |
|-------------|------------|------------|
| 5.05617610  | 0.00000000 | 0.00000000 |
| -2.52808800 | 4.37877690 | 0.00000000 |
| 0.00000000  | 0.00000000 | 5.56103770 |

fractional coordinates

|    |            |            |            |
|----|------------|------------|------------|
| O  | 0.41600800 | 0.24951100 | 0.30036900 |
| O  | 0.75048900 | 0.16649700 | 0.96703600 |
| O  | 0.83350300 | 0.58399200 | 0.63370200 |
| O  | 0.16649700 | 0.75048900 | 0.03296400 |
| O  | 0.58399200 | 0.83350300 | 0.36629700 |
| O  | 0.24951100 | 0.41600800 | 0.69963100 |
| Si | 0.47962400 | 0.00000000 | 0.16666700 |
| Si | 0.00000000 | 0.47962400 | 0.83333300 |
| Si | 0.52037600 | 0.52037600 | 0.50000000 |

Cleaved surface 18 layers B3LYP/6-31G\*

surface vectors

|             |            |
|-------------|------------|
| 5.00346790  | 0.00000000 |
| -2.50173400 | 4.33313030 |

fractional coordinates

|    |             |             |             |
|----|-------------|-------------|-------------|
| O  | 0.24578910  | 0.41833927  | -0.27027901 |
| O  | -0.17255018 | -0.41833927 | 0.27027901  |
| Si | -0.02594862 | 0.46784864  | -0.91458516 |
| Si | -0.49379727 | -0.46784864 | 0.91458516  |
| O  | -0.29354803 | 0.14320102  | -1.55260211 |
| O  | -0.43674906 | -0.14320102 | 1.55260211  |
| O  | 0.11739320  | -0.26613074 | -2.08959272 |
| O  | 0.38352394  | 0.26613074  | 2.08959272  |
| Si | 0.44747418  | -0.00844910 | -2.75265355 |
| Si | 0.45592328  | 0.00844910  | 2.75265355  |
| O  | 0.40697773  | 0.26896861  | -3.41577451 |
| O  | 0.13800912  | -0.26896861 | 3.41577451  |
| O  | -0.42735399 | -0.15781531 | -3.85708514 |
| O  | -0.26953868 | 0.15781531  | 3.85708514  |
| Si | -0.35575612 | -0.42622569 | -4.29350070 |

|    |             |             |             |
|----|-------------|-------------|-------------|
| Si | 0.07046958  | 0.42622569  | 4.29350070  |
| O  | -0.09146333 | -0.39260845 | -5.16832816 |
| O  | 0.30114513  | 0.39260845  | 5.16832816  |

Cleaved surface 18 layers B3LYP/L  
surface vectors

5.01035882 0.00000000  
-2.50517941 4.33909802

fractional coordinates

|    |             |             |             |
|----|-------------|-------------|-------------|
| O  | 0.24290897  | 0.41724113  | -0.25544545 |
| O  | -0.17433216 | -0.41724113 | 0.25544545  |
| Si | -0.02505823 | 0.46958247  | -0.91686595 |
| Si | -0.49464070 | -0.46958247 | 0.91686595  |
| O  | -0.29006394 | 0.14621045  | -1.57027703 |
| O  | -0.43627439 | -0.14621045 | 1.57027703  |
| O  | 0.12260154  | -0.26368956 | -2.08227167 |
| O  | 0.38629110  | 0.26368956  | 2.08227167  |
| Si | 0.44975713  | -0.00766247 | -2.76150609 |
| Si | 0.45741960  | 0.00766247  | 2.76150609  |
| O  | 0.40757067  | 0.26726436  | -3.43574299 |
| O  | 0.14030630  | -0.26726436 | 3.43574299  |
| O  | -0.42831226 | -0.15930928 | -3.86708071 |
| O  | -0.26900298 | 0.15930928  | 3.86708071  |
| Si | -0.35977286 | -0.42798187 | -4.31386010 |
| Si | 0.06820901  | 0.42798187  | 4.31386010  |
| O  | -0.09623262 | -0.39485841 | -5.19393634 |
| O  | 0.29862579  | 0.39485841  | 5.19393634  |

Cleaved surface 27 layers B3LYP/6-31G\*  
surface vectors

5.00346790 0.00000000  
-2.50173400 4.33313030

fractional coordinates

|    |             |             |             |
|----|-------------|-------------|-------------|
| Si | 0.45580539  | -0.00000000 | 0.00000000  |
| O  | 0.39524283  | 0.25896334  | -0.70401514 |
| O  | 0.13627949  | -0.25896334 | 0.70401514  |
| O  | -0.43212404 | -0.15514008 | -1.14858227 |
| O  | -0.27698395 | 0.15514008  | 1.14858227  |
| Si | -0.48920545 | -0.47325899 | -1.85189212 |
| Si | -0.01594645 | 0.47325899  | 1.85189212  |
| O  | -0.16707429 | -0.41367179 | -2.52808930 |
| O  | 0.24659751  | 0.41367179  | 2.52808930  |
| O  | 0.24921088  | 0.41876024  | -3.02656570 |
| O  | -0.16954937 | -0.41876024 | 3.02656570  |
| Si | -0.01960492 | 0.46919788  | -3.69333073 |
| Si | -0.48880281 | -0.46919788 | 3.69333073  |
| O  | -0.28694899 | 0.14405396  | -4.32873008 |
| O  | -0.43100295 | -0.14405396 | 4.32873008  |
| O  | 0.12639651  | -0.26718124 | -4.87681006 |
| O  | 0.39357775  | 0.26718124  | 4.87681006  |

|    |             |             |             |
|----|-------------|-------------|-------------|
| Si | 0.45636346  | -0.00884531 | -5.53627977 |
| Si | 0.46520877  | 0.00884531  | 5.53627977  |
| O  | 0.41516970  | 0.26749826  | -6.20730739 |
| O  | 0.14767144  | -0.26749826 | 6.20730739  |
| O  | -0.41595405 | -0.15752466 | -6.63228710 |
| O  | -0.25842938 | 0.15752466  | 6.63228710  |
| Si | -0.34608572 | -0.42670942 | -7.07662066 |
| Si | 0.08062371  | 0.42670942  | 7.07662066  |
| O  | -0.08194831 | -0.39346514 | -7.95147694 |
| O  | 0.31151684  | 0.39346514  | 7.95147694  |

Cleaved surface 27 layers B3LYP/L  
surface vectors

5.01035882 0.00000000  
-2.50517941 4.33909802

fractional coordinates

|    |             |             |             |
|----|-------------|-------------|-------------|
| Si | 0.45648832  | -0.00000000 | 0.00000000  |
| O  | 0.39643121  | 0.25990127  | -0.69536811 |
| O  | 0.13652994  | -0.25990127 | 0.69536811  |
| O  | -0.43195333 | -0.15457860 | -1.15158177 |
| O  | -0.27737473 | 0.15457860  | 1.15158177  |
| Si | -0.48854065 | -0.47325723 | -1.84550141 |
| Si | -0.01528342 | 0.47325723  | 1.84550141  |
| O  | -0.16639920 | -0.41429878 | -2.51585094 |
| O  | 0.24789958  | 0.41429878  | 2.51585094  |
| O  | 0.25027623  | 0.41832708  | -3.02009810 |
| O  | -0.16805085 | -0.41832708 | 3.02009810  |
| Si | -0.01716854 | 0.47134892  | -3.68272415 |
| Si | -0.48851746 | -0.47134892 | 3.68272415  |
| O  | -0.28237008 | 0.14781046  | -4.33431997 |
| O  | -0.43018053 | -0.14781046 | 4.33431997  |
| O  | 0.13113694  | -0.26224947 | -4.84939865 |
| O  | 0.39338641  | 0.26224947  | 4.84939865  |
| Si | 0.45829989  | -0.00651327 | -5.52866953 |
| Si | 0.46481316  | 0.00651327  | 5.52866953  |
| O  | 0.41622172  | 0.26801458  | -6.20792100 |
| O  | 0.14820714  | -0.26801458 | 6.20792100  |
| O  | -0.41885675 | -0.15816055 | -6.63014183 |
| O  | -0.26069620 | 0.15816055  | 6.63014183  |
| Si | -0.35048302 | -0.42668893 | -7.08135854 |
| Si | 0.07620591  | 0.42668893  | 7.08135854  |
| O  | -0.08666584 | -0.39330993 | -7.96039954 |
| O  | 0.30664409  | 0.39330993  | 7.96039954  |

Cleaved surface 36 layers B3LYP/6-31G\*  
surface vectors

5.00346790 0.00000000  
-2.50173400 4.33313030

fractional coordinates

|   |            |            |             |
|---|------------|------------|-------------|
| O | 0.24641640 | 0.41382909 | -0.23556060 |
|---|------------|------------|-------------|

|    |             |             |              |
|----|-------------|-------------|--------------|
| O  | -0.16741270 | -0.41382909 | 0.23556060   |
| Si | -0.01582074 | 0.47210887  | -0.92230350  |
| Si | -0.48792962 | -0.47210887 | 0.92230350   |
| O  | -0.27909298 | 0.15130728  | -1.60284230  |
| O  | -0.43040026 | -0.15130728 | 1.60284230   |
| O  | 0.13657624  | -0.26433372 | -2.08817256  |
| O  | 0.40090997  | 0.26433372  | 2.08817256   |
| Si | 0.45775710  | -0.00213822 | -2.76981155  |
| Si | 0.45989532  | 0.00213822  | 2.76981155   |
| O  | 0.39909564  | 0.25889193  | -3.46658982  |
| O  | 0.14020371  | -0.25889193 | 3.46658982   |
| O  | -0.42695110 | -0.15437647 | -3.91898328  |
| O  | -0.27257463 | 0.15437647  | 3.91898328   |
| Si | -0.48424042 | -0.47341997 | -4.61579620  |
| Si | -0.01082044 | 0.47341997  | 4.61579620   |
| O  | -0.16191663 | -0.41468314 | -5.28711891  |
| O  | 0.25276652  | 0.41468314  | 5.28711891   |
| O  | 0.25453930  | 0.41779150  | -5.79271262  |
| O  | -0.16325221 | -0.41779150 | 5.79271262   |
| Si | -0.01579857 | 0.46677396  | -6.45311539  |
| Si | -0.48257254 | -0.46677396 | 6.45311539   |
| O  | -0.28420125 | 0.14079053  | -7.07951958  |
| O  | -0.42499177 | -0.14079053 | 7.07951958   |
| O  | 0.12899637  | -0.27035834 | -7.64077430  |
| O  | 0.39935472  | 0.27035834  | 7.64077430   |
| Si | 0.46012352  | -0.01169600 | -8.29233935  |
| Si | 0.47181952  | 0.01169600  | 8.29233935   |
| O  | 0.42005987  | 0.26516682  | -8.96404178  |
| O  | 0.15489304  | -0.26516682 | 8.96404178   |
| O  | -0.41130370 | -0.16014231 | -9.38494859  |
| O  | -0.25116139 | 0.16014231  | 9.38494859   |
| Si | -0.34119350 | -0.42892382 | -9.83262153  |
| Si | 0.08773033  | 0.42892382  | 9.83262153   |
| O  | -0.07731242 | -0.39512167 | -10.71095885 |
| O  | 0.31780926  | 0.39512167  | 10.71095885  |

Cleaved surface 36 layers B3LYP/L  
surface vectors

5.01035882 0.00000000  
-2.50517941 4.33909802

fractional coordinates

|    |             |             |             |
|----|-------------|-------------|-------------|
| O  | 0.25001015  | 0.41560141  | -0.24140388 |
| O  | -0.16559127 | -0.41560141 | 0.24140388  |
| Si | -0.01171966 | 0.47498702  | -0.92319585 |
| Si | -0.48670668 | -0.47498702 | 0.92319585  |
| O  | -0.27290946 | 0.15566112  | -1.61785023 |
| O  | -0.42857058 | -0.15566112 | 1.61785023  |
| O  | 0.14129147  | -0.25861092 | -2.07443376 |
| O  | 0.39990238  | 0.25861092  | 2.07443376  |
| Si | 0.46118154  | 0.00114696  | -2.77104282 |

|    |             |             |              |
|----|-------------|-------------|--------------|
| Si | 0.46003459  | -0.00114696 | 2.77104282   |
| O  | 0.40087880  | 0.26065820  | -3.47009371  |
| O  | 0.14022060  | -0.26065820 | 3.47009371   |
| O  | -0.42727648 | -0.15366778 | -3.92157940  |
| O  | -0.27360869 | 0.15366778  | 3.92157940   |
| Si | -0.48551889 | -0.47254520 | -4.62044675  |
| Si | -0.01297369 | 0.47254520  | 4.62044675   |
| O  | -0.16414274 | -0.41285992 | -5.30135215  |
| O  | 0.24871718  | 0.41285992  | 5.30135215   |
| O  | 0.25228857  | 0.41872821  | -5.79082694  |
| O  | -0.16643964 | -0.41872821 | 5.79082694   |
| Si | -0.01548503 | 0.47025766  | -6.46008526  |
| Si | -0.48574269 | -0.47025766 | 6.46008526   |
| O  | -0.28177971 | 0.14570625  | -7.10104550  |
| O  | -0.42748596 | -0.14570625 | 7.10104550   |
| O  | 0.13269895  | -0.26570079 | -7.63835114  |
| O  | 0.39839974  | 0.26570079  | 7.63835114   |
| Si | 0.46146790  | -0.00936071 | -8.30648261  |
| Si | 0.47082862  | 0.00936071  | 8.30648261   |
| O  | 0.42125515  | 0.26545009  | -8.99350862  |
| O  | 0.15580506  | -0.26545009 | 8.99350862   |
| O  | -0.41286613 | -0.16047855 | -9.39720861  |
| O  | -0.25238758 | 0.16047855  | 9.39720861   |
| Si | -0.34325931 | -0.42787655 | -9.85439385  |
| Si | 0.08461724  | 0.42787655  | 9.85439385   |
| O  | -0.07920613 | -0.39327844 | -10.73518211 |
| O  | 0.31407231  | 0.39327844  | 10.73518211  |

Reconstructed surface 18 layers B3LYP/6-31G\*  
surface vectors

5.00346790 0.00000000  
-2.50173400 4.33313030

fractional coordinates

|    |             |             |             |
|----|-------------|-------------|-------------|
| O  | 0.32536687  | 0.49983285  | -0.39015820 |
| O  | -0.17446599 | -0.49983285 | 0.39015820  |
| Si | 0.01752638  | -0.49999920 | -0.91935559 |
| Si | -0.48247443 | 0.49999920  | 0.91935559  |
| O  | -0.18558415 | 0.19857461  | -1.87829748 |
| O  | -0.38415876 | -0.19857461 | 1.87829748  |
| O  | 0.11634856  | -0.19847476 | -1.87858592 |
| O  | 0.31482333  | 0.19847476  | 1.87858592  |
| Si | -0.21172009 | 0.17220982  | -3.52059701 |
| Si | -0.38392991 | -0.17220982 | 3.52059701  |
| O  | 0.04863255  | -0.49990235 | -4.16484852 |
| O  | -0.45146511 | 0.49990235  | 4.16484852  |
| O  | -0.15457773 | -0.10441508 | -4.01149015 |
| O  | -0.05016265 | 0.10441508  | 4.01149015  |
| Si | 0.11635888  | -0.17189247 | -3.52082672 |
| Si | 0.28825135  | 0.17189247  | 3.52082672  |
| O  | 0.44997870  | 0.10487112  | -4.01266831 |

O 0.34510758 -0.10487112 4.01266831

Reconstructed surface 18 layers B3LYP/L

surface vectors

5.01035882 0.00000000

-2.50517941 4.33909802

fractional coordinates

|    |             |             |             |
|----|-------------|-------------|-------------|
| O  | 0.32040900  | 0.49993454  | -0.37115507 |
| O  | -0.17952554 | -0.49993454 | 0.37115507  |
| Si | 0.01491635  | 0.49989916  | -0.92587445 |
| Si | -0.48498281 | -0.49989916 | 0.92587445  |
| O  | -0.18353348 | 0.19991038  | -1.89418227 |
| O  | -0.38344386 | -0.19991038 | 1.89418227  |
| O  | 0.11624510  | -0.20006070 | -1.89342160 |
| O  | 0.31630580  | 0.20006070  | 1.89342160  |
| Si | -0.21026600 | 0.17235387  | -3.53658073 |
| Si | -0.38261987 | -0.17235387 | 3.53658073  |
| O  | 0.04592732  | 0.49999161  | -4.18555831 |
| O  | -0.45406429 | -0.49999161 | 4.18555831  |
| O  | -0.15004311 | -0.10124226 | -4.02549318 |
| O  | -0.04880085 | 0.10124226  | 4.02549318  |
| Si | 0.11729828  | -0.17244973 | -3.53559303 |
| Si | 0.28974802  | 0.17244973  | 3.53559303  |
| O  | 0.45108734  | 0.10126198  | -4.02411830 |
| O  | 0.34982536  | -0.10126198 | 4.02411830  |

Reconstructed surface 27 layers B3LYP/6-31G\*

surface vectors

5.00346790 0.00000000

-2.50173400 4.33313030

fractional coordinates

|    |             |             |             |
|----|-------------|-------------|-------------|
| Si | 0.46902749  | -0.00000000 | 0.00000000  |
| O  | 0.14804516  | -0.24492982 | 0.74486145  |
| O  | 0.39297499  | 0.24492982  | -0.74486145 |
| O  | -0.25428158 | 0.16335476  | 1.10369146  |
| O  | -0.41763634 | -0.16335476 | -1.10369146 |
| Si | 0.00379978  | 0.47676032  | 1.84604435  |
| Si | -0.47296054 | -0.47676032 | -1.84604435 |
| O  | 0.28971792  | 0.44531059  | 2.44754700  |
| O  | -0.15559268 | -0.44531059 | -2.44754700 |
| O  | -0.15905978 | -0.45168089 | 3.10047205  |
| O  | 0.29262112  | 0.45168089  | -3.10047205 |
| Si | -0.48356553 | 0.49647414  | 3.70707597  |
| Si | 0.01996033  | -0.49647414 | -3.70707597 |
| O  | -0.40001897 | -0.20547198 | 4.67170711  |
| O  | -0.19454699 | 0.20547198  | -4.67170711 |
| O  | 0.34154256  | 0.19523727  | 4.68969448  |
| O  | 0.14630529  | -0.19523727 | -4.68969448 |
| Si | -0.36160825 | -0.18272239 | 6.31590956  |
| Si | -0.17888586 | 0.18272239  | -6.31590956 |

|    |             |             |             |
|----|-------------|-------------|-------------|
| O  | 0.38262250  | 0.48842734  | 6.97202551  |
| O  | -0.10580484 | -0.48842734 | -6.97202551 |
| O  | -0.01988553 | -0.11695866 | 6.74720769  |
| O  | 0.09707313  | 0.11695866  | -6.74720769 |
| Si | 0.31862975  | 0.16222159  | 6.32598623  |
| Si | 0.15640816  | -0.16222159 | -6.32598623 |
| O  | -0.41570613 | 0.09126970  | 6.86672391  |
| O  | 0.49302417  | -0.09126970 | -6.86672391 |

Reconstructed surface 27 layers B3LYP/L  
surface vectors

5.01035882 0.00000000  
-2.50517941 4.33909802

fractional coordinates

|    |             |             |             |
|----|-------------|-------------|-------------|
| Si | 0.46941440  | -0.00000000 | 0.00000000  |
| O  | 0.14792244  | -0.24945019 | 0.72629585  |
| O  | 0.39737263  | 0.24945019  | -0.72629585 |
| O  | -0.25670652 | 0.15987607  | 1.11709909  |
| O  | -0.41658259 | -0.15987607 | -1.11709909 |
| Si | 0.00000189  | 0.47629780  | 1.84491726  |
| Si | -0.47629592 | -0.47629780 | -1.84491726 |
| O  | 0.28072050  | 0.44135177  | 2.47810929  |
| O  | -0.16063128 | -0.44135177 | -2.47810929 |
| O  | -0.16336061 | -0.44602594 | 3.07453579  |
| O  | 0.28266533  | 0.44602594  | -3.07453579 |
| Si | -0.48678782 | 0.49590413  | 3.71491390  |
| Si | 0.01730805  | -0.49590413 | -3.71491390 |
| O  | -0.40232612 | -0.20869758 | 4.69237294  |
| O  | -0.19362854 | 0.20869758  | -4.69237294 |
| O  | 0.34782741  | 0.19566929  | 4.70421325  |
| O  | 0.15215812  | -0.19566929 | -4.70421325 |
| Si | -0.36186997 | -0.18522191 | 6.33457363  |
| Si | -0.17664806 | 0.18522191  | -6.33457363 |
| O  | 0.38666635  | 0.48592386  | 6.99293210  |
| O  | -0.09925751 | -0.48592386 | -6.99293210 |
| O  | -0.01936451 | -0.11567017 | 6.75122774  |
| O  | 0.09630566  | 0.11567017  | -6.75122774 |
| Si | 0.31985797  | 0.16052190  | 6.34017880  |
| Si | 0.15933607  | -0.16052190 | -6.34017880 |
| O  | -0.41969785 | 0.08478723  | 6.89119576  |
| O  | 0.49551492  | -0.08478723 | -6.89119576 |

Reconstructed surface 36 layers B3LYP/6-31G\*  
surface vectors

5.00346790 0.00000000  
-2.50173400 4.33313030

fractional coordinates

|    |             |             |             |
|----|-------------|-------------|-------------|
| O  | -0.16879558 | -0.40549943 | 0.20805060  |
| O  | 0.23670385  | 0.40549943  | -0.20805060 |
| Si | -0.48912608 | -0.46831649 | 0.91599530  |



|    |             |             |             |
|----|-------------|-------------|-------------|
| Si | -0.02080958 | 0.46831649  | -0.91599530 |
| O  | -0.43984560 | -0.14861994 | 1.56929404  |
| O  | -0.29122566 | 0.14861994  | -1.56929404 |
| O  | 0.41442218  | 0.27906573  | 2.11839324  |
| O  | 0.13535644  | -0.27906573 | -2.11839324 |
| Si | 0.47414975  | 0.01532845  | 2.77548835  |
| Si | 0.45882131  | -0.01532845 | -2.77548835 |
| O  | 0.15808299  | -0.22992593 | 3.55453049  |
| O  | 0.38800893  | 0.22992593  | -3.55453049 |
| O  | -0.23596290 | 0.16751087  | 3.82397186  |
| O  | -0.40347378 | -0.16751087 | -3.82397186 |
| Si | 0.01369066  | 0.48026106  | 4.60387122  |
| Si | -0.46657041 | -0.48026106 | -4.60387122 |
| O  | 0.29922049  | 0.44721666  | 5.19788704  |
| O  | -0.14799618 | -0.44721666 | -5.19788704 |
| O  | -0.15574203 | -0.46125809 | 5.87083515  |
| O  | 0.30551607  | 0.46125809  | -5.87083515 |
| Si | -0.47921282 | 0.49145263  | 6.46751147  |
| Si | 0.02933456  | -0.49145263 | -6.46751147 |
| O  | -0.39626730 | -0.21114280 | 7.43354151  |
| O  | -0.18512449 | 0.21114280  | -7.43354151 |
| O  | 0.34232872  | 0.18930652  | 7.44476334  |
| O  | 0.15302220  | -0.18930652 | -7.44476334 |
| Si | -0.35927704 | -0.18875761 | 9.07694741  |
| Si | -0.17051942 | 0.18875761  | -9.07694741 |
| O  | 0.38472207  | 0.48227158  | 9.73065355  |
| O  | -0.09754951 | -0.48227158 | -9.73065355 |
| O  | -0.01764189 | -0.12303844 | 9.50869752  |
| O  | 0.10539655  | 0.12303844  | -9.50869752 |
| Si | 0.32039306  | 0.15610187  | 9.08221517  |
| Si | 0.16429118  | -0.15610187 | -9.08221517 |
| O  | -0.41385805 | 0.08526992  | 9.62286100  |
| O  | -0.49912796 | -0.08526992 | -9.62286100 |

Reconstructed surface 36 layers B3LYP/L  
surface vectors

5.01035882 0.00000000  
-2.50517941 4.33909802

fractional coordinates

|    |             |             |             |
|----|-------------|-------------|-------------|
| O  | -0.16659519 | -0.40854609 | 0.20946026  |
| O  | 0.24195091  | 0.40854609  | -0.20946026 |
| Si | -0.48570038 | -0.46938879 | 0.91844055  |
| Si | -0.01631159 | 0.46938879  | -0.91844055 |
| O  | -0.43196817 | -0.14904616 | 1.58210012  |
| O  | -0.28292200 | 0.14904616  | -1.58210012 |
| O  | 0.41503693  | 0.27513202  | 2.10894268  |
| O  | 0.13990492  | -0.27513202 | -2.10894268 |
| Si | 0.47487156  | 0.01237110  | 2.77341127  |
| Si | 0.46250046  | -0.01237110 | -2.77341127 |
| O  | 0.15644827  | -0.23576296 | 3.52505502  |

|    |             |             |             |
|----|-------------|-------------|-------------|
| O  | 0.39221123  | 0.23576296  | -3.52505502 |
| O  | -0.24113188 | 0.16552052  | 3.84843967  |
| O  | -0.40665240 | -0.16552052 | -3.84843967 |
| Si | 0.00927823  | 0.48121095  | 4.60524908  |
| Si | -0.47193272 | -0.48121095 | -4.60524908 |
| O  | 0.29160312  | 0.44730088  | 5.22719108  |
| O  | -0.15569776 | -0.44730088 | -5.22719108 |
| O  | -0.15841288 | -0.45129216 | 5.84934605  |
| O  | 0.29287928  | 0.45129216  | -5.84934605 |
| Si | -0.48073591 | 0.49670784  | 6.47631336  |
| Si | 0.02255625  | -0.49670784 | -6.47631336 |
| O  | -0.39563409 | -0.20749706 | 7.45205835  |
| O  | -0.18813703 | 0.20749706  | -7.45205835 |
| O  | 0.34899339  | 0.19628674  | 7.46355798  |
| O  | 0.15270665  | -0.19628674 | -7.46355798 |
| Si | -0.35791353 | -0.18438688 | 9.09578486  |
| Si | -0.17352665 | 0.18438688  | -9.09578486 |
| O  | 0.38987681  | 0.48686454  | 9.75267744  |
| O  | -0.09698773 | -0.48686454 | -9.75267744 |
| O  | -0.01579754 | -0.11504398 | 9.51944699  |
| O  | 0.09924644  | 0.11504398  | -9.51944699 |
| Si | 0.32272875  | 0.16124330  | 9.10007860  |
| Si | 0.16148545  | -0.16124330 | -9.10007860 |
| O  | -0.41596234 | 0.08601546  | 9.64486366  |
| O  | 0.49802219  | -0.08601546 | -9.64486366 |

Hydrogenated surface 18 layers B3LYP/6-31G\*  
surface vectors

5.00346794 0.00000000  
-2.50173397 4.33313034

fractional coordinates

|    |             |             |             |
|----|-------------|-------------|-------------|
| H  | -0.37713079 | -0.43830743 | -5.62485709 |
| H  | 0.06117664  | 0.43830743  | 5.62485709  |
| H  | 0.10083017  | 0.14232876  | -5.57818609 |
| H  | -0.04149859 | -0.14232876 | 5.57818609  |
| O  | -0.16534400 | -0.36399260 | 5.38547596  |
| O  | 0.19864859  | 0.36399260  | -5.38547596 |
| O  | -0.45807856 | -0.13166524 | 4.06104925  |
| O  | -0.32641332 | 0.13166524  | -4.06104925 |
| O  | 0.45306691  | 0.31926615  | 3.33180306  |
| O  | 0.13380076  | -0.31926615 | -3.33180306 |
| O  | 0.18126900  | -0.21576282 | 1.95991187  |
| O  | 0.39703182  | 0.21576282  | -1.95991187 |
| O  | -0.21422153 | 0.17598624  | 1.73836076  |
| O  | -0.39020777 | -0.17598624 | -1.73836076 |
| O  | 0.29536311  | 0.43426034  | 0.28433500  |
| O  | -0.13889722 | -0.43426034 | -0.28433500 |
| O  | -0.15297602 | -0.35988701 | -5.61873800 |
| O  | 0.20691100  | 0.35988701  | 5.61873800  |
| Si | -0.49467768 | -0.45638951 | 4.61545593  |

|    |             |             |             |
|----|-------------|-------------|-------------|
| Si | -0.03828817 | 0.45638951  | -4.61545593 |
| Si | 0.49021395  | 0.03498769  | 2.75782464  |
| Si | 0.45522626  | -0.03498769 | -2.75782464 |
| Si | 0.02898452  | 0.48967211  | 0.93714285  |
| Si | -0.46068759 | -0.48967211 | -0.93714285 |

Hydrogenated surface 18 layers B3LYP/L  
surface vectors

5.01035882 0.00000000  
-2.50517941 4.33909802

fractional coordinates

|    |             |             |             |
|----|-------------|-------------|-------------|
| H  | -0.36950125 | -0.43117884 | -5.66133315 |
| H  | 0.06167759  | 0.43117884  | 5.66133315  |
| H  | 0.11517425  | 0.16027875  | -5.64935087 |
| H  | -0.04510451 | -0.16027875 | 5.64935087  |
| O  | -0.16985793 | -0.37947663 | 5.41296923  |
| O  | 0.20961870  | 0.37947663  | -5.41296923 |
| O  | -0.45341268 | -0.14267621 | 4.04190296  |
| O  | -0.31073647 | 0.14267621  | -4.04190296 |
| O  | 0.44612586  | 0.30321691  | 3.37274783  |
| O  | 0.14290894  | -0.30321691 | -3.37274783 |
| O  | 0.17138049  | -0.22867562 | 1.99538107  |
| O  | 0.40005611  | 0.22867562  | -1.99538107 |
| O  | -0.22838505 | 0.16742349  | 1.70528621  |
| O  | -0.39580854 | -0.16742349 | -1.70528621 |
| O  | 0.28106943  | 0.42858673  | 0.26165695  |
| O  | -0.14751730 | -0.42858673 | -0.26165695 |
| O  | -0.14657856 | -0.35955435 | -5.67078140 |
| O  | 0.21297579  | 0.35955435  | 5.67078140  |
| Si | -0.49558698 | -0.46601066 | 4.63474267  |
| Si | -0.02957632 | 0.46601066  | -4.63474267 |
| Si | 0.48424888  | 0.02264892  | 2.76590567  |
| Si | 0.46159996  | -0.02264892 | -2.76590567 |
| Si | 0.01714774  | 0.48461246  | 0.93523301  |
| Si | -0.46746472 | -0.48461246 | -0.93523301 |

Hydrogenated surface 27 layers B3LYP/6-31G\*  
surface vectors

5.00346794 0.00000000  
-2.50173397 4.33313034

fractional coordinates

|    |             |             |             |
|----|-------------|-------------|-------------|
| Si | 0.48314117  | 0.00000000  | 0.00000000  |
| O  | 0.42134610  | 0.25973602  | -0.69047447 |
| O  | 0.16161008  | -0.25973602 | 0.69047447  |
| O  | -0.40325220 | -0.15316876 | -1.15254377 |
| O  | -0.25008344 | 0.15316876  | 1.15254377  |
| Si | -0.46055636 | -0.47298216 | -1.84210369 |
| Si | 0.01242581  | 0.47298216  | 1.84210369  |
| O  | -0.14170102 | -0.42303730 | -2.50701414 |
| O  | 0.28133628  | 0.42303730  | 2.50701414  |

|    |             |             |             |
|----|-------------|-------------|-------------|
| O  | 0.28244659  | 0.42366718  | -3.03043938 |
| O  | -0.14122059 | -0.42366718 | 3.03043938  |
| Si | 0.02324364  | 0.48852408  | -3.70144636 |
| Si | -0.46528043 | -0.48852408 | 3.70144636  |
| O  | -0.22142364 | 0.17392936  | -4.49124234 |
| O  | -0.39535300 | -0.17392936 | 4.49124234  |
| O  | 0.17820852  | -0.22120647 | -4.74480330 |
| O  | 0.39941499  | 0.22120647  | 4.74480330  |
| Si | 0.48681736  | 0.03328793  | -5.52968268 |
| Si | 0.45352942  | -0.03328793 | 5.52968268  |
| O  | 0.44944972  | 0.31755181  | -6.10301273 |
| O  | 0.13189791  | -0.31755181 | 6.10301273  |
| O  | -0.45742280 | -0.13103161 | -6.83143234 |
| O  | -0.32639119 | 0.13103161  | 6.83143234  |
| Si | -0.49643660 | -0.45692579 | -7.38516823 |
| Si | -0.03951082 | 0.45692579  | 7.38516823  |
| O  | -0.16705745 | -0.36553979 | -8.15298896 |
| O  | 0.19848234  | 0.36553979  | 8.15298896  |
| O  | -0.15462200 | -0.36039073 | 8.39169314  |
| O  | 0.20576872  | 0.36039073  | -8.39169314 |
| H  | -0.37860418 | -0.43783651 | 8.39447995  |
| H  | 0.05923233  | 0.43783651  | -8.39447995 |
| H  | 0.10077186  | 0.14407319  | 8.34900602  |
| H  | -0.04330132 | -0.14407319 | -8.34900602 |

Hydrogenated surface 27 layers B3LYP/L  
surface vectors

5.01035882 0.00000000  
-2.50517941 4.33909802

fractional coordinates

|    |             |             |             |
|----|-------------|-------------|-------------|
| Si | 0.48014418  | 0.00000000  | 0.00000000  |
| O  | 0.41897818  | 0.26032784  | -0.68463504 |
| O  | 0.15865034  | -0.26032784 | 0.68463504  |
| O  | -0.40745100 | -0.15331314 | -1.15511377 |
| O  | -0.25413786 | 0.15331314  | 1.15511377  |
| Si | -0.46631974 | -0.47400114 | -1.83976640 |
| Si | 0.00768141  | 0.47400114  | 1.83976640  |
| O  | -0.14755800 | -0.42190352 | -2.51345488 |
| O  | 0.27434551  | 0.42190352  | 2.51345488  |
| O  | 0.27361541  | 0.41941253  | -3.01448316 |
| O  | -0.14579713 | -0.41941253 | 3.01448316  |
| Si | 0.01382578  | 0.48182591  | -3.69351510 |
| Si | -0.46800013 | -0.48182591 | 3.69351510  |
| O  | -0.23472884 | 0.16410484  | -4.44910449 |
| O  | -0.39883368 | -0.16410484 | 4.44910449  |
| O  | 0.16854686  | -0.23549744 | -4.77230512 |
| O  | 0.40404430  | 0.23549744  | 4.77230512  |
| Si | 0.48145647  | 0.02024770  | -5.52598279 |
| Si | 0.46120877  | -0.02024770 | 5.52598279  |
| O  | 0.44210640  | 0.30060332  | -6.12776199 |

|    |             |             |             |
|----|-------------|-------------|-------------|
| O  | 0.14150308  | -0.30060332 | 6.12776199  |
| O  | -0.45089700 | -0.14184255 | -6.79880864 |
| O  | -0.30905446 | 0.14184255  | 6.79880864  |
| Si | -0.49635196 | -0.46688435 | -7.38718340 |
| Si | -0.02946762 | 0.46688435  | 7.38718340  |
| O  | -0.16996248 | -0.38178663 | -8.15599295 |
| O  | 0.21182415  | 0.38178663  | 8.15599295  |
| O  | -0.14768275 | -0.36116421 | 8.42945629  |
| O  | 0.21348146  | 0.36116421  | -8.42945629 |
| H  | -0.37023241 | -0.43097187 | 8.41104873  |
| H  | 0.06073945  | 0.43097187  | -8.41104873 |
| H  | 0.11724788  | 0.16297357  | 8.39891982  |
| H  | -0.04572569 | -0.16297357 | -8.39891982 |

Hydrogenated surface 36 layers B3LYP/6-31G\*  
surface vectors

5.00346790 0.00000000  
-2.50173400 4.33313030

fractional coordinates

|    |             |             |             |
|----|-------------|-------------|-------------|
| O  | 0.26642079  | 0.41242192  | -0.23102528 |
| O  | -0.14600114 | -0.41242192 | 0.23102528  |
| Si | 0.00494550  | 0.47138847  | -0.92090874 |
| Si | -0.46644298 | -0.47138847 | 0.92090874  |
| O  | -0.25941139 | 0.15068908  | -1.59662758 |
| O  | -0.41010047 | -0.15068908 | 1.59662758  |
| O  | 0.15772208  | -0.26693818 | -2.09295510 |
| O  | 0.42466026  | 0.26693818  | 2.09295510  |
| Si | 0.47889673  | -0.00321682 | -2.76826718 |
| Si | 0.48211355  | 0.00321682  | 2.76826718  |
| O  | 0.41691307  | 0.25588276  | -3.46386751 |
| O  | 0.16103030  | -0.25588276 | 3.46386751  |
| O  | -0.40306413 | -0.15457352 | -3.91123886 |
| O  | -0.24849061 | 0.15457352  | 3.91123886  |
| Si | -0.46316749 | -0.47486844 | -4.60758489 |
| Si | 0.01170096  | 0.47486844  | 4.60758489  |
| O  | -0.14465784 | -0.42528808 | -5.27426550 |
| O  | 0.28063024  | 0.42528808  | 5.27426550  |
| O  | 0.28036072  | 0.42346016  | -5.79673885 |
| O  | -0.14309944 | -0.42346016 | 5.79673885  |
| Si | 0.02053673  | 0.48698756  | -6.46950369 |
| Si | -0.46645083 | -0.48698756 | 6.46950369  |
| O  | -0.22372948 | 0.17220056  | -7.25963858 |
| O  | -0.39593004 | -0.17220056 | 7.25963858  |
| O  | 0.17547171  | -0.22276792 | -7.51317687 |
| O  | 0.39823963  | 0.22276792  | 7.51317687  |
| Si | 0.48439605  | 0.03129496  | -8.29769067 |
| Si | 0.45310109  | -0.03129496 | 8.29769067  |
| O  | 0.44719858  | 0.31558726  | -8.87150021 |
| O  | 0.13161132  | -0.31558726 | 8.87150021  |
| O  | -0.45994082 | -0.13324738 | -9.59879677 |

|    |             |             |              |
|----|-------------|-------------|--------------|
| O  | -0.32669343 | 0.13324738  | 9.59879677   |
| Si | -0.49907305 | -0.45908705 | -10.15368411 |
| Si | -0.03998599 | 0.45908705  | 10.15368411  |
| O  | -0.16991263 | -0.36787272 | -10.92291613 |
| O  | 0.19796010  | 0.36787272  | 10.92291613  |
| O  | -0.15528069 | -0.35823678 | 11.15936534  |
| O  | 0.20295610  | 0.35823678  | -11.15936534 |
| H  | -0.37923252 | -0.43551489 | 11.16173165  |
| H  | 0.05628238  | 0.43551489  | -11.16173165 |
| H  | 0.10043671  | 0.14645054  | 11.11956088  |
| H  | -0.04601384 | -0.14645054 | -11.11956088 |

Hydrogenated surface 36 layers B3LYP/L  
surface vectors

5.01035882 0.00000000  
-2.50517941 4.33909802

fractional coordinates

|    |             |             |              |
|----|-------------|-------------|--------------|
| O  | 0.26102199  | 0.41251194  | -0.22328880  |
| O  | -0.15148995 | -0.41251194 | 0.22328880   |
| Si | 0.00031368  | 0.47099264  | -0.92068989  |
| Si | -0.47067895 | -0.47099264 | 0.92068989   |
| O  | -0.26245011 | 0.14948186  | -1.59530654  |
| O  | -0.41193197 | -0.14948186 | 1.59530654   |
| O  | 0.15427910  | -0.26768065 | -2.09183791  |
| O  | 0.42195975  | 0.26768065  | 2.09183791   |
| Si | 0.47567179  | -0.00462446 | -2.76508722  |
| Si | 0.48029625  | 0.00462446  | 2.76508722   |
| O  | 0.41458510  | 0.25515674  | -3.45583685  |
| O  | 0.15942836  | -0.25515674 | 3.45583685   |
| O  | -0.40813332 | -0.15655609 | -3.91114505  |
| O  | -0.25157722 | 0.15655609  | 3.91114505   |
| Si | -0.46811983 | -0.47704428 | -4.60267317  |
| Si | 0.00892445  | 0.47704428  | 4.60267317   |
| O  | -0.14901987 | -0.42454212 | -5.27386277  |
| O  | 0.27552225  | 0.42454212  | 5.27386277   |
| O  | 0.27285816  | 0.41830736  | -5.78103297  |
| O  | -0.14544920 | -0.41830736 | 5.78103297   |
| Si | 0.01255579  | 0.48029144  | -6.45697632  |
| Si | -0.46773565 | -0.48029144 | 6.45697632   |
| O  | -0.23573142 | 0.16285002  | -7.21463903  |
| O  | -0.39858144 | -0.16285002 | 7.21463903   |
| O  | 0.16705960  | -0.23651918 | -7.53333075  |
| O  | 0.40357878  | 0.23651918  | 7.53333075   |
| Si | 0.47993278  | 0.01871314  | -8.28884506  |
| Si | 0.46121965  | -0.01871314 | 8.28884506   |
| O  | 0.44072345  | 0.29901626  | -8.89156193  |
| O  | 0.14170720  | -0.29901626 | 8.89156193   |
| O  | -0.45303856 | -0.14389031 | -9.56175939  |
| O  | -0.30914825 | 0.14389031  | 9.56175939   |
| Si | -0.49785146 | -0.46858139 | -10.15142296 |

|    |             |             |              |
|----|-------------|-------------|--------------|
| Si | -0.02927007 | 0.46858139  | 10.15142296  |
| O  | -0.17152937 | -0.38351506 | -10.92048572 |
| O  | 0.21198570  | 0.38351506  | 10.92048572  |
| O  | -0.14708927 | -0.35912239 | 11.19403422  |
| O  | 0.21203311  | 0.35912239  | -11.19403422 |
| H  | -0.36957298 | -0.42868674 | 11.17455991  |
| H  | 0.05911376  | 0.42868674  | -11.17455991 |
| H  | 0.11775879  | 0.16469053  | 11.16233248  |
| H  | -0.04693173 | -0.16469053 | -11.16233248 |

Cleaved surface 18 layers PBE

cell vectors

|             |            |             |
|-------------|------------|-------------|
| 5.05224940  | 0.00000000 | 0.00000000  |
| -2.52612470 | 4.37537630 | 0.00000000  |
| 0.00000000  | 0.00000000 | 20.80000000 |

fractional coordinates

|    |            |            |            |
|----|------------|------------|------------|
| O  | 0.70083900 | 0.08949200 | 0.83692900 |
| O  | 0.26599900 | 0.43199200 | 0.77439000 |
| O  | 0.85615600 | 0.59475000 | 0.75585100 |
| O  | 0.61549300 | 0.87257600 | 0.68863800 |
| O  | 0.43864900 | 0.28526600 | 0.66633900 |
| O  | 0.18270700 | 0.76441400 | 0.60086400 |
| O  | 0.76441400 | 0.18270700 | 0.57859100 |
| O  | 0.28526600 | 0.43864900 | 0.51311500 |
| O  | 0.87257600 | 0.61549300 | 0.49081600 |
| O  | 0.59475100 | 0.85615600 | 0.42360300 |
| O  | 0.43199200 | 0.26599900 | 0.40506400 |
| O  | 0.08949200 | 0.70083900 | 0.34252400 |
| Si | 0.92831300 | 0.35698600 | 0.79534900 |
| Si | 0.54189900 | 0.54894800 | 0.72230700 |
| Si | 0.49928300 | 0.02624300 | 0.63381200 |
| Si | 0.02624300 | 0.49928300 | 0.54564200 |
| Si | 0.54894900 | 0.54189800 | 0.45714700 |
| Si | 0.35698600 | 0.92831300 | 0.38410600 |

Cleaved surface 18 layers PW91

cell vectors

|             |            |             |
|-------------|------------|-------------|
| 5.05617610  | 0.00000000 | 0.00000000  |
| -2.52808800 | 4.37877690 | 0.00000000  |
| 0.00000000  | 0.00000000 | 20.80000000 |

fractional coordinates

|   |            |            |            |
|---|------------|------------|------------|
| O | 0.69862600 | 0.08331700 | 0.83617600 |
| O | 0.26325200 | 0.43262400 | 0.77411600 |
| O | 0.85271400 | 0.59306900 | 0.75671300 |
| O | 0.61694700 | 0.87289300 | 0.68861200 |
| O | 0.44057500 | 0.28594100 | 0.66685500 |
| O | 0.18934700 | 0.77042800 | 0.60007900 |
| O | 0.77042800 | 0.18934700 | 0.57937600 |
| O | 0.28594100 | 0.44057500 | 0.51259900 |
| O | 0.87289300 | 0.61694700 | 0.49084200 |

|    |            |            |            |
|----|------------|------------|------------|
| O  | 0.59307000 | 0.85271400 | 0.42274100 |
| O  | 0.43262400 | 0.26325200 | 0.40533800 |
| O  | 0.08331700 | 0.69862600 | 0.34327700 |
| Si | 0.92422200 | 0.35255900 | 0.79492400 |
| Si | 0.54091300 | 0.54946900 | 0.72267000 |
| Si | 0.50353300 | 0.02957600 | 0.63400100 |
| Si | 0.02957600 | 0.50353300 | 0.54545300 |
| Si | 0.54947000 | 0.54091200 | 0.45678400 |
| Si | 0.35255900 | 0.92422200 | 0.38453100 |

Cleaved surface 27 layers PBE

cell vectors

|             |            |             |
|-------------|------------|-------------|
| 5.05224940  | 0.00000000 | 0.00000000  |
| -2.52612470 | 4.37537630 | 0.00000000  |
| 0.00000000  | 0.00000000 | 26.30000000 |

fractional coordinates

|    |            |            |            |
|----|------------|------------|------------|
| O  | 0.69281800 | 0.08196800 | 0.98536800 |
| O  | 0.25730800 | 0.42237600 | 0.93546900 |
| O  | 0.84690600 | 0.58380000 | 0.92037800 |
| O  | 0.60546500 | 0.86478500 | 0.86801000 |
| O  | 0.42925400 | 0.27818800 | 0.84958200 |
| O  | 0.17732100 | 0.75888900 | 0.79788200 |
| O  | 0.76096400 | 0.17612700 | 0.78127200 |
| O  | 0.27041200 | 0.43285000 | 0.72700800 |
| O  | 0.85585300 | 0.60329100 | 0.71190600 |
| O  | 0.60329200 | 0.85585300 | 0.65687700 |
| O  | 0.43285000 | 0.27041200 | 0.64177500 |
| O  | 0.17612700 | 0.76096400 | 0.58751000 |
| O  | 0.75888900 | 0.17732100 | 0.57090000 |
| O  | 0.27818800 | 0.42925400 | 0.51920000 |
| O  | 0.86478500 | 0.60546400 | 0.50077200 |
| O  | 0.58380100 | 0.84690500 | 0.44840400 |
| O  | 0.42237600 | 0.25730800 | 0.43331400 |
| O  | 0.08196800 | 0.69281800 | 0.38341400 |
| Si | 0.91928600 | 0.34705900 | 0.95197200 |
| Si | 0.53272700 | 0.54016500 | 0.89416200 |
| Si | 0.49252500 | 0.01965200 | 0.82432500 |
| Si | 0.01633700 | 0.49348900 | 0.75449100 |
| Si | 0.54019300 | 0.54019300 | 0.68439100 |
| Si | 0.49348900 | 0.01633600 | 0.61429100 |
| Si | 0.01965200 | 0.49252500 | 0.54445800 |
| Si | 0.54016600 | 0.53272700 | 0.47462000 |
| Si | 0.34705900 | 0.91928500 | 0.41681000 |

Cleaved surface 36 layers PBE

cell vectors

|             |            |             |
|-------------|------------|-------------|
| 5.05224940  | 0.00000000 | 0.00000000  |
| -2.52612470 | 4.37537630 | 0.00000000  |
| 0.00000000  | 0.00000000 | 31.90000000 |

fractional coordinates



|    |            |            |            |
|----|------------|------------|------------|
| O  | 0.68419400 | 0.07348400 | 0.98768000 |
| O  | 0.24746700 | 0.41664500 | 0.94643500 |
| O  | 0.83820000 | 0.57986900 | 0.93490800 |
| O  | 0.60042100 | 0.86380400 | 0.89158300 |
| O  | 0.42583600 | 0.27813100 | 0.87580400 |
| O  | 0.17462600 | 0.75696800 | 0.83340000 |
| O  | 0.75865900 | 0.17384900 | 0.82002000 |
| O  | 0.26578000 | 0.42906300 | 0.77489600 |
| O  | 0.85142800 | 0.59965400 | 0.76266900 |
| O  | 0.59958300 | 0.85133300 | 0.71707600 |
| O  | 0.42953700 | 0.26613400 | 0.70473400 |
| O  | 0.17506700 | 0.75911000 | 0.65957400 |
| O  | 0.75911000 | 0.17506600 | 0.64654800 |
| O  | 0.26613400 | 0.42953700 | 0.60138800 |
| O  | 0.85133300 | 0.59958300 | 0.58904600 |
| O  | 0.59965500 | 0.85142800 | 0.54345300 |
| O  | 0.42906300 | 0.26578000 | 0.53122700 |
| O  | 0.17385000 | 0.75865900 | 0.48610200 |
| O  | 0.75696800 | 0.17462600 | 0.47272200 |
| O  | 0.27813100 | 0.42583600 | 0.43031800 |
| O  | 0.86380400 | 0.60042100 | 0.41453900 |
| O  | 0.57986900 | 0.83820000 | 0.37121400 |
| O  | 0.41664500 | 0.24746600 | 0.35968700 |
| O  | 0.07348400 | 0.68419400 | 0.31844200 |
| Si | 0.90977000 | 0.34038500 | 0.96032700 |
| Si | 0.52597300 | 0.53774200 | 0.91288500 |
| Si | 0.48885500 | 0.01841200 | 0.85532300 |
| Si | 0.01289300 | 0.49067800 | 0.79773300 |
| Si | 0.53606000 | 0.53597900 | 0.73985200 |
| Si | 0.49136300 | 0.01306000 | 0.68196600 |
| Si | 0.01306000 | 0.49136300 | 0.62415600 |
| Si | 0.53598000 | 0.53606000 | 0.56627000 |
| Si | 0.49067800 | 0.01289200 | 0.50838900 |
| Si | 0.01841300 | 0.48885500 | 0.45079900 |
| Si | 0.53774200 | 0.52597300 | 0.39323700 |
| Si | 0.34038500 | 0.90976900 | 0.34579500 |

Reconstructed surface 18 layers PBE

cell vectors

|             |            |             |
|-------------|------------|-------------|
| 5.05224940  | 0.00000000 | 0.00000000  |
| -2.52612470 | 4.37537630 | 0.00000000  |
| 0.00000000  | 0.00000000 | 19.80000000 |

fractional coordinates

|   |            |            |            |
|---|------------|------------|------------|
| O | 0.27546000 | 0.41465500 | 0.98743300 |
| O | 0.77573800 | 0.41449500 | 0.02240900 |
| O | 0.77958000 | 0.11475000 | 0.90981200 |
| O | 0.58018200 | 0.71406700 | 0.10010700 |
| O | 0.07925400 | 0.71442800 | 0.90982200 |
| O | 0.28059200 | 0.11510500 | 0.10010500 |
| O | 0.00322900 | 0.41461600 | 0.79334100 |

|    |            |            |            |
|----|------------|------------|------------|
| O  | 0.35620200 | 0.41459800 | 0.21673800 |
| O  | 0.82208800 | 0.82126800 | 0.80210300 |
| O  | 0.94382900 | 0.82109800 | 0.20765800 |
| O  | 0.41542800 | 0.00796300 | 0.80212900 |
| O  | 0.53733800 | 0.00810600 | 0.20764200 |
| Si | 0.97455600 | 0.41458000 | 0.95824300 |
| Si | 0.47499000 | 0.41458000 | 0.05149900 |
| Si | 0.75453500 | 0.08793100 | 0.82684600 |
| Si | 0.60430500 | 0.74113600 | 0.18307000 |
| Si | 0.08119000 | 0.74128400 | 0.82685100 |
| Si | 0.27774400 | 0.08805100 | 0.18307000 |

Reconstructed surface 27 layers PBE

cell vectors

|             |            |             |
|-------------|------------|-------------|
| 5.05224940  | 0.00000000 | 0.00000000  |
| -2.52612470 | 4.37537630 | 0.00000000  |
| 0.00000000  | 0.00000000 | 25.70000000 |

fractional coordinates

|    |            |            |            |
|----|------------|------------|------------|
| O  | 0.15607300 | 0.76539900 | 0.03099000 |
| O  | 0.39067300 | 0.23460100 | 0.96901000 |
| O  | 0.75109200 | 0.17552300 | 0.04110400 |
| O  | 0.57556900 | 0.82447700 | 0.95889600 |
| O  | 0.26421000 | 0.43857200 | 0.09861400 |
| O  | 0.82563600 | 0.56142800 | 0.90138600 |
| O  | 0.81937400 | 0.55025300 | 0.11878900 |
| O  | 0.26912100 | 0.44974700 | 0.88121100 |
| O  | 0.59105800 | 0.78657000 | 0.18336200 |
| O  | 0.80448800 | 0.21343000 | 0.81663800 |
| O  | 0.34431100 | 0.19239100 | 0.18365600 |
| O  | 0.15192000 | 0.80760900 | 0.81634400 |
| O  | 0.38994100 | 0.48264800 | 0.27331200 |
| O  | 0.90729400 | 0.51735200 | 0.72668800 |
| O  | 0.97701400 | 0.88923500 | 0.26347300 |
| O  | 0.08777900 | 0.11076500 | 0.73652700 |
| O  | 0.56887000 | 0.07386900 | 0.26896800 |
| O  | 0.49500100 | 0.92613100 | 0.73103200 |
| Si | 0.46943000 | 0.00000000 | 0.00000000 |
| Si | 0.99547700 | 0.48225700 | 0.07219900 |
| Si | 0.51322000 | 0.51774300 | 0.92780100 |
| Si | 0.50244900 | 0.49192800 | 0.14535100 |
| Si | 0.01052000 | 0.50807200 | 0.85464900 |
| Si | 0.63393200 | 0.81056600 | 0.24723500 |
| Si | 0.82336600 | 0.18943400 | 0.75276500 |
| Si | 0.31677800 | 0.15815000 | 0.24740100 |
| Si | 0.15862700 | 0.84185000 | 0.75259900 |

Reconstructed surface 27 layers PW91

cell vectors

|             |            |            |
|-------------|------------|------------|
| 5.05617610  | 0.00000000 | 0.00000000 |
| -2.52808800 | 4.37877690 | 0.00000000 |

0.00000000 0.00000000 25.70000000  
fractional coordinates  
O 0.16003000 0.76325900 0.03062400  
O 0.39677100 0.23674100 0.96937600  
O 0.75309400 0.17487400 0.04137300  
O 0.57822000 0.82512600 0.95862700  
O 0.25565400 0.43963300 0.10095800  
O 0.81601800 0.56036700 0.89904200  
O 0.81336200 0.55718900 0.11730900  
O 0.25617300 0.44281100 0.88269100  
O 0.59274700 0.78961300 0.18461300  
O 0.80313400 0.21038700 0.81538700  
O 0.35321000 0.19810400 0.18479000  
O 0.15510600 0.80189600 0.81521000  
O 0.39390600 0.48468800 0.27443500  
O 0.90921900 0.51531200 0.72556500  
O 0.98000200 0.89382700 0.26406200  
O 0.08617500 0.10617300 0.73593800  
O 0.56965200 0.07415600 0.27055200  
O 0.49549600 0.92584400 0.72944800  
Si 0.47353900 0.00000000 0.00000000  
Si 0.99368200 0.48375600 0.07228500  
Si 0.50992600 0.51624400 0.92771500  
Si 0.50228100 0.49643400 0.14625500  
Si 0.00584600 0.50356600 0.85374500  
Si 0.63550700 0.81263900 0.24848200  
Si 0.82286900 0.18736100 0.75151800  
Si 0.32133400 0.16106500 0.24845500  
Si 0.16026800 0.83893500 0.75154500

Reconstructed surface 36 layers PBE  
cell vectors

5.05224940 0.00000000 0.00000000  
-2.52612470 4.37537630 0.00000000  
0.00000000 0.00000000 31.20000000  
fractional coordinates  
O 0.83724100 0.59313700 0.00458200  
O 0.24410500 0.40686300 0.99541800  
O 0.58633100 0.84443100 0.05183300  
O 0.74190100 0.15556900 0.94816700  
O 0.43844600 0.27095100 0.06686800  
O 0.16749600 0.72904900 0.93313200  
O 0.19205900 0.77877000 0.11496800  
O 0.41328900 0.22123000 0.88503200  
O 0.79421300 0.17986900 0.12191800  
O 0.61434400 0.82013100 0.87808200  
O 0.30999200 0.44604400 0.16815500  
O 0.86394800 0.55395600 0.83184500  
O 0.85857700 0.54556200 0.18701700  
O 0.31301600 0.45443800 0.81298300

|    |            |            |            |
|----|------------|------------|------------|
| O  | 0.62524900 | 0.78789800 | 0.23858500 |
| O  | 0.83735100 | 0.21210200 | 0.76141500 |
| O  | 0.37279500 | 0.19255300 | 0.23876500 |
| O  | 0.18024200 | 0.80744700 | 0.76123500 |
| O  | 0.41920900 | 0.48293100 | 0.31258400 |
| O  | 0.93627800 | 0.51706900 | 0.68741600 |
| O  | 0.00704400 | 0.88951100 | 0.30472800 |
| O  | 0.11753300 | 0.11048900 | 0.69527200 |
| O  | 0.59910700 | 0.07472900 | 0.30892800 |
| O  | 0.52437800 | 0.92527100 | 0.69107200 |
| Si | 0.52645400 | 0.52770300 | 0.02953100 |
| Si | 0.99875100 | 0.47229700 | 0.97046900 |
| Si | 0.50312800 | 0.01708900 | 0.08916100 |
| Si | 0.48603900 | 0.98291100 | 0.91083900 |
| Si | 0.03621600 | 0.48763300 | 0.14780200 |
| Si | 0.54858200 | 0.51236700 | 0.85219800 |
| Si | 0.53986300 | 0.49322100 | 0.20750700 |
| Si | 0.04664100 | 0.50677900 | 0.79249300 |
| Si | 0.66403300 | 0.81089900 | 0.29124500 |
| Si | 0.85313400 | 0.18910100 | 0.70875500 |
| Si | 0.34629900 | 0.15828200 | 0.29126700 |
| Si | 0.18801600 | 0.84171800 | 0.70873300 |

Hydrogenated surface 18L PBE

cell vectors

|             |            |             |
|-------------|------------|-------------|
| 5.05224940  | 0.00000000 | 0.00000000  |
| -2.52612470 | 4.37537630 | 0.00000000  |
| 0.00000000  | 0.00000000 | 22.00000000 |

fractional coordinates

|    |            |            |            |
|----|------------|------------|------------|
| H  | 0.61665800 | 0.55777300 | 0.74517400 |
| H  | 0.05888400 | 0.44222700 | 0.25482600 |
| H  | 0.11100200 | 0.16613800 | 0.74268000 |
| H  | 0.94486400 | 0.83386200 | 0.25732000 |
| O  | 0.82346100 | 0.61703600 | 0.24584200 |
| O  | 0.20642600 | 0.38296400 | 0.75415800 |
| O  | 0.55259000 | 0.85645000 | 0.18204600 |
| O  | 0.69614000 | 0.14355000 | 0.81795400 |
| O  | 0.44546000 | 0.29857800 | 0.15373300 |
| O  | 0.14688100 | 0.70142200 | 0.84626700 |
| O  | 0.18588500 | 0.78142200 | 0.08875100 |
| O  | 0.40446300 | 0.21857800 | 0.91124900 |
| O  | 0.78401400 | 0.17998500 | 0.07877400 |
| O  | 0.60402900 | 0.82001500 | 0.92122600 |
| O  | 0.27959900 | 0.42799800 | 0.01096800 |
| O  | 0.85160100 | 0.57200200 | 0.98903200 |
| O  | 0.83918700 | 0.63037700 | 0.74394100 |
| O  | 0.20881000 | 0.36962300 | 0.25605900 |
| Si | 0.50168400 | 0.53363400 | 0.20974800 |
| Si | 0.96805100 | 0.46636600 | 0.79025200 |
| Si | 0.49230200 | 0.02750700 | 0.12524100 |

|    |            |            |            |
|----|------------|------------|------------|
| Si | 0.46479400 | 0.97249300 | 0.87475900 |
| Si | 0.02391400 | 0.49048500 | 0.04228800 |
| Si | 0.53342900 | 0.50951500 | 0.95771200 |

Hydrogenated surface 18L PW91

cell vectors

|             |            |             |
|-------------|------------|-------------|
| 5.05617610  | 0.00000000 | 0.00000000  |
| -2.52808800 | 4.37877690 | 0.00000000  |
| 0.00000000  | 0.00000000 | 22.00000000 |

fractional coordinates

|    |            |            |            |
|----|------------|------------|------------|
| H  | 0.60831800 | 0.55125900 | 0.74717500 |
| H  | 0.05705800 | 0.44874100 | 0.25282500 |
| H  | 0.10357200 | 0.16125700 | 0.74312800 |
| H  | 0.94231400 | 0.83874300 | 0.25687200 |
| O  | 0.82103600 | 0.62193500 | 0.24553200 |
| O  | 0.19910200 | 0.37806500 | 0.75446800 |
| O  | 0.55399300 | 0.86276100 | 0.18145200 |
| O  | 0.69123200 | 0.13723900 | 0.81854800 |
| O  | 0.44928700 | 0.30595100 | 0.15266200 |
| O  | 0.14333600 | 0.69404900 | 0.84733800 |
| O  | 0.19461700 | 0.79040200 | 0.08729500 |
| O  | 0.40421500 | 0.20959800 | 0.91270500 |
| O  | 0.79299200 | 0.18885900 | 0.07933800 |
| O  | 0.60413300 | 0.81114100 | 0.92066200 |
| O  | 0.28890000 | 0.42986300 | 0.01185900 |
| O  | 0.85903700 | 0.57013700 | 0.98814100 |
| O  | 0.83131400 | 0.62677200 | 0.74646300 |
| O  | 0.20454200 | 0.37322800 | 0.25353700 |
| Si | 0.50194400 | 0.53929700 | 0.20859600 |
| Si | 0.96264800 | 0.46070300 | 0.79140400 |
| Si | 0.49742700 | 0.03555900 | 0.12467400 |
| Si | 0.46186700 | 0.96444100 | 0.87532600 |
| Si | 0.03320800 | 0.49517300 | 0.04199500 |
| Si | 0.53803500 | 0.50482700 | 0.95800500 |

Hydrogenated surface 27L PBE

cell vectors

|             |            |             |
|-------------|------------|-------------|
| 5.05224940  | 0.00000000 | 0.00000000  |
| -2.52612470 | 4.37537630 | 0.00000000  |
| 0.00000000  | 0.00000000 | 27.00000000 |

fractional coordinates

|   |            |            |            |
|---|------------|------------|------------|
| H | 0.93634400 | 0.37795100 | 0.68864400 |
| H | 0.37795100 | 0.93634400 | 0.31135600 |
| H | 0.05225100 | 0.88018500 | 0.68612200 |
| H | 0.88018500 | 0.05225100 | 0.31387800 |
| O | 0.57456400 | 0.82503200 | 0.97304200 |
| O | 0.82503200 | 0.57456400 | 0.02695800 |
| O | 0.40252100 | 0.23847300 | 0.95859300 |
| O | 0.23847300 | 0.40252100 | 0.04140700 |
| O | 0.15311600 | 0.73158200 | 0.90477500 |

|    |            |            |            |
|----|------------|------------|------------|
| O  | 0.73158200 | 0.15311600 | 0.09522500 |
| O  | 0.73207700 | 0.15132100 | 0.88953100 |
| O  | 0.15132100 | 0.73207700 | 0.11046900 |
| O  | 0.22071700 | 0.39673700 | 0.83311600 |
| O  | 0.39673700 | 0.22071700 | 0.16688400 |
| O  | 0.81479000 | 0.58852100 | 0.82409500 |
| O  | 0.58852100 | 0.81479000 | 0.17590500 |
| O  | 0.55634600 | 0.84478400 | 0.77031600 |
| O  | 0.84478400 | 0.55634600 | 0.22968400 |
| O  | 0.44131900 | 0.29146000 | 0.74896500 |
| O  | 0.29146000 | 0.44131800 | 0.25103500 |
| O  | 0.17231700 | 0.78445600 | 0.69605300 |
| O  | 0.78445600 | 0.17231700 | 0.30394700 |
| O  | 0.78432600 | 0.15610500 | 0.68696700 |
| O  | 0.15610500 | 0.78432600 | 0.31303300 |
| Si | 0.50875000 | 0.50875000 | 0.00000000 |
| Si | 0.46644500 | 0.98694100 | 0.93157300 |
| Si | 0.98694100 | 0.46644500 | 0.06842700 |
| Si | 0.98113000 | 0.46818000 | 0.86266100 |
| Si | 0.46818000 | 0.98113000 | 0.13733900 |
| Si | 0.50836500 | 0.52891800 | 0.79453100 |
| Si | 0.52891800 | 0.50836500 | 0.20546900 |
| Si | 0.49450300 | 0.02352500 | 0.72533500 |
| Si | 0.02352500 | 0.49450300 | 0.27466500 |

Hydrogenated surface 36L PBE  
cell vectors

|             |            |             |
|-------------|------------|-------------|
| 5.05224940  | 0.00000000 | 0.00000000  |
| -2.52612470 | 4.37537630 | 0.00000000  |
| 0.00000000  | 0.00000000 | 32.00000000 |

fractional coordinates

|   |            |            |            |
|---|------------|------------|------------|
| H | 0.61102600 | 0.55266800 | 0.34754600 |
| H | 0.05835800 | 0.44733200 | 0.65245400 |
| H | 0.10738900 | 0.16375300 | 0.34961900 |
| H | 0.94363700 | 0.83624700 | 0.65038100 |
| O | 0.26405700 | 0.41600500 | 0.99321700 |
| O | 0.84805300 | 0.58399500 | 0.00678300 |
| O | 0.75573300 | 0.16531500 | 0.94860100 |
| O | 0.59041900 | 0.83468500 | 0.05139900 |
| O | 0.17076200 | 0.75022700 | 0.93634900 |
| O | 0.42053600 | 0.24977300 | 0.06365100 |
| O | 0.41996400 | 0.25583400 | 0.89139600 |
| O | 0.16413000 | 0.74416600 | 0.10860400 |
| O | 0.59360200 | 0.84239300 | 0.87853500 |
| O | 0.75120900 | 0.15760700 | 0.12146500 |
| O | 0.84826600 | 0.58214400 | 0.83471000 |
| O | 0.26612200 | 0.41785600 | 0.16529000 |
| O | 0.27062500 | 0.42541900 | 0.82027700 |
| O | 0.84520500 | 0.57458100 | 0.17972300 |
| O | 0.77730200 | 0.18210900 | 0.77383400 |

|    |            |            |            |
|----|------------|------------|------------|
| O  | 0.59519400 | 0.81789100 | 0.22616600 |
| O  | 0.18185900 | 0.78160200 | 0.76622700 |
| O  | 0.40025700 | 0.21839800 | 0.23377300 |
| O  | 0.44211000 | 0.29927300 | 0.72153100 |
| O  | 0.14283700 | 0.70072700 | 0.27846900 |
| O  | 0.55370600 | 0.85927400 | 0.70269700 |
| O  | 0.69443200 | 0.14072600 | 0.29730300 |
| O  | 0.82314900 | 0.62002800 | 0.65858100 |
| O  | 0.20312000 | 0.37997200 | 0.34141900 |
| O  | 0.83339300 | 0.62461100 | 0.34861000 |
| O  | 0.20878200 | 0.37538900 | 0.65139000 |
| Si | 0.00975600 | 0.47953200 | 0.97126200 |
| Si | 0.53022400 | 0.52046800 | 0.02873800 |
| Si | 0.48555300 | 0.00358500 | 0.91366800 |
| Si | 0.48196800 | 0.99641500 | 0.08633200 |
| Si | 0.53239200 | 0.52620700 | 0.85632200 |
| Si | 0.00618500 | 0.47379300 | 0.14367800 |
| Si | 0.01862500 | 0.49344400 | 0.79856200 |
| Si | 0.52518100 | 0.50655600 | 0.20143800 |
| Si | 0.48876800 | 0.02915900 | 0.74142500 |
| Si | 0.45961000 | 0.97084100 | 0.25857500 |
| Si | 0.50116700 | 0.53686500 | 0.68329400 |
| Si | 0.96430300 | 0.46313500 | 0.31670600 |

CO adsorbed B3LYP/L

surface vectors

10.02071764 0.00000000  
-5.01035882 8.67819604

fractional coordinates

|    |             |             |             |
|----|-------------|-------------|-------------|
| Si | -0.22802290 | 0.26526238  | -0.92659805 |
| Si | -0.49328528 | -0.26526238 | 0.92659805  |
| Si | 0.26059831  | -0.25085314 | -0.91392785 |
| Si | -0.48854855 | 0.25085314  | 0.91392785  |
| Si | 0.26895063  | 0.26246239  | -0.94795466 |
| Si | 0.00648824  | -0.26246239 | 0.94795466  |
| Si | -0.23657802 | -0.24927093 | -0.93267569 |
| Si | 0.01269291  | 0.24927093  | 0.93267569  |
| Si | 0.22411110  | 0.48673967  | -2.82692163 |
| Si | -0.26262857 | -0.48673967 | 2.82692163  |
| Si | -0.26992502 | -0.01313035 | -2.68045101 |
| Si | -0.25679467 | 0.01313035  | 2.68045101  |
| Si | -0.26431745 | 0.49094766  | -2.82567131 |
| Si | 0.24473489  | -0.49094766 | 2.82567131  |
| Si | 0.22824273  | -0.01358983 | -2.70191203 |
| Si | 0.24183257  | 0.01358983  | 2.70191203  |
| Si | -0.01170663 | -0.25863309 | -4.63778871 |
| Si | 0.24692646  | 0.25863309  | 4.63778871  |
| Si | 0.48351997  | 0.22670589  | -4.62521637 |
| Si | 0.25681409  | -0.22670589 | 4.62521637  |
| Si | 0.48568410  | -0.26110321 | -4.57973556 |

|    |             |             |             |
|----|-------------|-------------|-------------|
| Si | -0.25321269 | 0.26110321  | 4.57973556  |
| Si | -0.02073936 | 0.22031168  | -4.65315447 |
| Si | -0.24105104 | -0.22031168 | 4.65315447  |
| O  | 0.11077067  | -0.30979007 | 5.66088525  |
| O  | 0.42056074  | 0.30979007  | -5.66088525 |
| O  | -0.39934075 | 0.16651155  | 5.60665236  |
| O  | 0.43414769  | -0.16651155 | -5.60665236 |
| O  | -0.37486315 | -0.28223513 | 5.79601302  |
| O  | -0.09262802 | 0.28223513  | -5.79601302 |
| O  | 0.10018757  | 0.17827698  | 5.67408532  |
| O  | -0.07808942 | -0.17827698 | -5.67408532 |
| O  | -0.06564949 | 0.29875624  | -0.25796274 |
| O  | -0.36440573 | -0.29875624 | 0.25796274  |
| O  | 0.42106322  | -0.22589707 | -0.27198843 |
| O  | -0.35303971 | 0.22589707  | 0.27198843  |
| O  | 0.43238363  | 0.29578740  | -0.30465404 |
| O  | 0.13659623  | -0.29578740 | 0.30465404  |
| O  | -0.07764752 | -0.22577474 | -0.27658517 |
| O  | 0.14812722  | 0.22577474  | 0.27658517  |
| O  | -0.19367903 | 0.42053207  | -1.74149356 |
| O  | 0.38578890  | -0.42053207 | 1.74149356  |
| O  | 0.29529993  | -0.09062583 | -1.64696940 |
| O  | 0.38592576  | 0.09062583  | 1.64696940  |
| O  | 0.29811516  | 0.41381639  | -1.79934899 |
| O  | -0.11570123 | -0.41381639 | 1.79934899  |
| O  | -0.20172363 | -0.08635638 | -1.60345258 |
| O  | -0.11536725 | 0.08635638  | 1.60345258  |
| O  | 0.19228728  | -0.39079368 | -2.00985040 |
| O  | -0.41691904 | 0.39079368  | 2.00985040  |
| O  | -0.29550175 | 0.11759604  | -1.94238571 |
| O  | -0.41309779 | -0.11759604 | 1.94238571  |
| O  | -0.29847285 | -0.38426161 | -2.07382588 |
| O  | 0.08578876  | 0.38426161  | 2.07382588  |
| O  | 0.19858764  | 0.11217897  | -1.92838947 |
| O  | 0.08640867  | -0.11217897 | 1.92838947  |
| O  | 0.06597618  | 0.34903923  | -3.47487885 |
| O  | -0.28306305 | -0.34903923 | 3.47487885  |
| O  | -0.43166834 | -0.15209939 | -3.27536194 |
| O  | -0.27956894 | 0.15209939  | 3.27536194  |
| O  | -0.42259800 | 0.34961920  | -3.43038779 |
| O  | 0.22778280  | -0.34961920 | 3.43038779  |
| O  | 0.06722682  | -0.14921078 | -3.33059124 |
| O  | 0.21643760  | 0.14921078  | 3.33059124  |
| O  | -0.14788704 | -0.42578405 | -4.08866368 |
| O  | 0.27789701  | 0.42578405  | 4.08866368  |
| O  | 0.34591345  | 0.06880182  | -3.95149849 |
| O  | 0.27711163  | -0.06880182 | 3.95149849  |
| O  | 0.34095169  | -0.42429489 | -4.07238922 |
| O  | -0.23475343 | 0.42429489  | 4.07238922  |
| O  | -0.15409274 | 0.06178618  | -3.94971557 |



|   |             |             |             |
|---|-------------|-------------|-------------|
| O | -0.21587891 | -0.06178618 | 3.94971557  |
| O | 0.12199326  | -0.27806457 | -5.43469901 |
| O | 0.40005783  | 0.27806457  | 5.43469901  |
| O | -0.40337221 | 0.17602922  | -5.41368126 |
| O | 0.42059858  | -0.17602922 | 5.41368126  |
| O | -0.39541577 | -0.30455510 | -5.37058632 |
| O | -0.09086067 | 0.30455510  | 5.37058632  |
| O | 0.10311007  | 0.17793460  | -5.36391749 |
| O | -0.07482454 | -0.17793460 | 5.36391749  |
| H | -0.02759254 | 0.41463532  | 5.58060072  |
| H | -0.44222787 | -0.41463532 | -5.58060072 |
| H | 0.48373399  | -0.06401599 | 5.57353426  |
| H | -0.45225002 | 0.06401599  | -5.57353426 |
| H | 0.43310103  | 0.34529039  | 6.23140868  |
| H | 0.08781064  | -0.34529039 | -6.23140868 |
| H | -0.01458539 | -0.06889242 | 5.62966501  |
| H | 0.05430702  | 0.06889242  | -5.62966501 |
| H | 0.03655478  | -0.27208416 | 5.63289825  |
| H | 0.30863894  | 0.27208416  | -5.63289825 |
| H | -0.48139706 | 0.19403740  | 5.53955385  |
| H | 0.32456554  | -0.19403740 | -5.53955385 |
| H | -0.45623256 | -0.25474832 | 5.68833375  |
| H | -0.20148425 | 0.25474832  | -5.68833375 |
| H | 0.02333437  | 0.21232403  | 5.59975160  |
| H | -0.18898967 | -0.21232403 | -5.59975160 |
| C | -0.47909129 | 0.47299597  | 7.88182628  |
| C | 0.04791274  | -0.47299597 | -7.88182628 |
| O | -0.42687826 | -0.45811024 | 8.82454261  |
| O | 0.03123198  | 0.45811024  | -8.82454261 |

CO adsorbed PBE  
cell vectors

|             |            |             |
|-------------|------------|-------------|
| 10.10449880 | 0.00000000 | 0.00000000  |
| -5.05224940 | 8.75075260 | 0.00000000  |
| 0.00000000  | 0.00000000 | 22.00000000 |

fractional coordinates

|   |            |            |            |
|---|------------|------------|------------|
| H | 0.41966400 | 0.33430300 | 0.28429600 |
| H | 0.54387500 | 0.75274300 | 0.25661100 |
| H | 0.79359000 | 0.25102300 | 0.74303400 |
| H | 0.51119100 | 0.19257600 | 0.25146300 |
| H | 0.31477800 | 0.79660000 | 0.74736600 |
| H | 0.04119700 | 0.74503500 | 0.25739300 |
| H | 0.29236700 | 0.24923200 | 0.74326300 |
| H | 0.01071400 | 0.19707800 | 0.25301100 |
| H | 0.81640800 | 0.79987700 | 0.74892900 |
| H | 0.06632500 | 0.60797000 | 0.73793100 |
| H | 0.48070100 | 0.93635800 | 0.25541200 |
| H | 0.54445700 | 0.06119700 | 0.74436800 |
| H | 0.95717400 | 0.38915600 | 0.26169500 |
| H | 0.57067200 | 0.61283600 | 0.73734000 |

|   |            |            |            |
|---|------------|------------|------------|
| H | 0.98264300 | 0.93587600 | 0.25682100 |
| H | 0.04332700 | 0.05981800 | 0.74599000 |
| C | 0.49968100 | 0.47534700 | 0.35716100 |
| O | 0.54570700 | 0.55591900 | 0.39829700 |
| O | 0.38664000 | 0.26338000 | 0.24930900 |
| O | 0.61511900 | 0.71569500 | 0.75455300 |
| O | 0.89718200 | 0.28439700 | 0.24641500 |
| O | 0.59539700 | 0.17161900 | 0.75397700 |
| O | 0.42160200 | 0.82543000 | 0.24644000 |
| O | 0.11185000 | 0.71206200 | 0.75401100 |
| O | 0.09439700 | 0.17105100 | 0.75430200 |
| O | 0.92415900 | 0.82574800 | 0.24640100 |
| O | 0.35393400 | 0.58081000 | 0.81561400 |
| O | 0.76814300 | 0.41588300 | 0.18527000 |
| O | 0.35369800 | 0.06760900 | 0.82458700 |
| O | 0.28053600 | 0.92355400 | 0.17503800 |
| O | 0.85148500 | 0.58028800 | 0.81550500 |
| O | 0.27037500 | 0.41117500 | 0.18666100 |
| O | 0.85325800 | 0.07011700 | 0.82503600 |
| O | 0.78856900 | 0.93207500 | 0.17572200 |
| O | 0.57604100 | 0.35499400 | 0.83814700 |
| O | 0.22024900 | 0.63670000 | 0.16337800 |
| O | 0.57146200 | 0.85832900 | 0.84921400 |
| O | 0.71353400 | 0.14047600 | 0.15112500 |
| O | 0.07706600 | 0.35701800 | 0.83796900 |
| O | 0.71945700 | 0.64305600 | 0.16276500 |
| O | 0.07343000 | 0.85405700 | 0.85015600 |
| O | 0.21034000 | 0.13644800 | 0.15198500 |
| O | 0.69316500 | 0.60638600 | 0.90707800 |
| O | 0.08787800 | 0.38688600 | 0.09411100 |
| O | 0.70351500 | 0.11159900 | 0.91639800 |
| O | 0.58928700 | 0.88268200 | 0.08680200 |
| O | 0.19660600 | 0.60718900 | 0.90732300 |
| O | 0.58551500 | 0.39148400 | 0.09350600 |
| O | 0.20389200 | 0.10956600 | 0.91569300 |
| O | 0.09019300 | 0.88579600 | 0.08397400 |
| O | 0.29928400 | 0.40984200 | 0.91631400 |
| O | 0.88569000 | 0.58562800 | 0.08428600 |
| O | 0.29491300 | 0.90382300 | 0.92732000 |
| O | 0.38685400 | 0.09385000 | 0.07440000 |
| O | 0.79890900 | 0.41161100 | 0.91677200 |
| O | 0.38788000 | 0.58185900 | 0.08515200 |
| O | 0.79104300 | 0.90320100 | 0.92677800 |
| O | 0.88433400 | 0.09196900 | 0.07259900 |
| O | 0.42933600 | 0.30285000 | 0.98965100 |
| O | 0.12330500 | 0.69192900 | 0.01077600 |
| O | 0.40992800 | 0.76391300 | 0.99124400 |
| O | 0.64362600 | 0.23154400 | 0.01155600 |
| O | 0.93070300 | 0.30567500 | 0.98989600 |
| O | 0.62495800 | 0.69320400 | 0.01151700 |

|    |            |            |            |
|----|------------|------------|------------|
| O  | 0.91024300 | 0.76504600 | 0.98916400 |
| O  | 0.14180900 | 0.22853700 | 0.01037500 |
| O  | 0.62379900 | 0.72375800 | 0.26248300 |
| O  | 0.90416000 | 0.28510800 | 0.73910700 |
| O  | 0.59209800 | 0.16380200 | 0.25507600 |
| O  | 0.42543100 | 0.82999300 | 0.74497600 |
| O  | 0.11658900 | 0.70944700 | 0.26120500 |
| O  | 0.40272500 | 0.28259200 | 0.73900400 |
| O  | 0.08727900 | 0.16287700 | 0.25630800 |
| O  | 0.92731400 | 0.83383600 | 0.74713600 |
| Si | 0.48882200 | 0.74638700 | 0.79136200 |
| Si | 0.73982100 | 0.25089800 | 0.20927400 |
| Si | 0.47981700 | 0.22056800 | 0.78823000 |
| Si | 0.25632000 | 0.77268400 | 0.21212800 |
| Si | 0.98858500 | 0.74526600 | 0.79181000 |
| Si | 0.23690300 | 0.24427000 | 0.21106700 |
| Si | 0.98017700 | 0.22193800 | 0.78839200 |
| Si | 0.75994200 | 0.77888900 | 0.21234500 |
| Si | 0.72996200 | 0.48806300 | 0.87012100 |
| Si | 0.24234200 | 0.50392700 | 0.13183700 |
| Si | 0.73136800 | 0.98750000 | 0.87983900 |
| Si | 0.74366600 | 0.01040900 | 0.12108500 |
| Si | 0.23177800 | 0.48834700 | 0.87002100 |
| Si | 0.73993400 | 0.50950800 | 0.13094200 |
| Si | 0.23324300 | 0.98550900 | 0.87990300 |
| Si | 0.24196200 | 0.00849400 | 0.12096000 |
| Si | 0.26792400 | 0.26268200 | 0.95765200 |
| Si | 0.00148900 | 0.73177400 | 0.04249700 |
| Si | 0.25536300 | 0.74155300 | 0.95886900 |
| Si | 0.51078800 | 0.25515900 | 0.04270100 |
| Si | 0.76851900 | 0.26506100 | 0.95831800 |
| Si | 0.50228000 | 0.73046100 | 0.04415900 |
| Si | 0.75379600 | 0.74180600 | 0.95833800 |
| Si | 0.01078400 | 0.25382500 | 0.04211700 |
